# Supplementary material for: Long-non Coding RNAs Related to Fat Deposition in Pigs Included lncRNA Corresponding to Human MALAT1
Source: Preprints.org preprint supplement (doi:10.20944/preprints202103.0356.v1), 2021-03-12
Supplement: Supplementary file 1 [file Table S1.docx]

| **Table S1.** Primers and probes used in qPCR analysis | | | | | | | |
| --- | --- | --- | --- | --- | --- | --- | --- |
| Gene | | Primers and Probe  or  Taqman Gene Expression Assay ID | Amplicon length [bp] | Label | Reference sequences accesion numbers | Exon Boundary |
| *RPL27* | 60S ribosomal protein L27  **housekeeping gene** | 5`NED – CGGTCATCGTAAAGAA  CGCTACTCCGGACGCAAA  GGTCTGAGGTGCCATCATCA | 55 | NED | ENSSSCG00000025507 | 1-2 |
| *OAZ1* | ornithine decarboxylase antizyme 1  **housekeeping gene** | Ss03387505_u1 | 177 | FAM | NM_001122994.1 | 5-5 |
| *RPS29* | Ribosomal protein S29  **housekeeping gene** | Ss03391548_g1 | 71 | VIC | NM_001001633.2 | 2-3 |
| *AHSG* | Alpha 2-HS Glycoprotein | Ss03374810_m1 | 60 | FAM | XM_005652369.3 | 6-7 |
| *DHCR24* | 24-Dehydrocholesterol Reductase | Ss04323966_m1 | 104 | FAM | NM_001243354.1 | 2-3 |
| - PCK1 | Phosphoenolpyruvate Carboxykinase 1 | Ss03390599_g1 | 71 | FAM | NM_001040464.1 | 3-4 |
| *IRF7* | Interferon Regulatory Factor 7 | Ss03385312_u1 | 129 | FAM | NM_001097428.1 | 7 |
| *SPP1* | Secreted Phosphoprotein 1 | Ss03391323_m1 | 59 | FAM | NM_214023.1 | 5-6 |
|  |  |  |  |  |  |  |
|  |  |  |  |  |  |  |
| *CXCL9* | C-X-C Motif Chemokine Ligand 9 | Ss03390033_m1 | 75 | FAM | NM_001114289.2 | 1-2 |
| *CXCL10* | C-X-C Motif Chemokine Ligand 10 | Ss03391846_m1 | 149 | FAM | NM_001008691.1 | 3-4 |
| *ENSSSCG00000048856 (MALAT1)* | lncRNA | CAGAGCAAAGGAAGTGGCTTA  CAGCTGCCTGCTGTTTTCT | 219 | EvaGreen | ENSSSCG00000048856 | 1-2 |
| *ENSSSCG00000041577* | lncRNA | AGGCAGCCTCACCCTCACT  CGTCCTGAGTGCCTCGTC | 120 | EvaGreen | *ENSSSCG00000041577* | 2-3 |
| *ENSSSCG00000048394* | lncRNA | CTCTCCTGCCTGCACCAC  TCCTGGTGCTGGTGGTCT | 255 | EvaGreen | *ENSSSCG00000048394* | 1-2 |
| *ENSSSCG00000047207* | lncRNA | TTTTCACCAGGGACGTCTTC  CTTCCACGGCAGAGTCCTT | 342 | EvaGreen | *ENSSSCG00000047207* | 1-2 |
| *ENSSSCG00000047442* | lncRNA | GGAAGCTGAGCATGACCAAG  CAACGAAGCAGTGGGTGG | 196 | EvaGreen | ENSSSCG00000047442 | 1-2 |
| *ENSSSCG00000047210* | lncRNA | AAGTGAAGGACCTTGAGATG CAGAGTGTGTGGGACCCAAT | 206 | EvaGreen | ENSSSCG00000047210 | 2-3 |
| *ENSSSCG00000051330* | lncRNA | ACGTACCCCAACCTGTGC  AACAACCCAAGGAGTTGACG | 248 | EvaGreen | ENSSSCG00000051330 | 1-2 |
| *ENSSSCG00000003846*  *(GLIS1)* | lncRNA | ACTACGGCCCGTCCAAAG  GAAATGCAGCAGCCTCTCAC | 200 | EvaGreen | ENSSSCG00000003846 | 2-3 |
