# Supplementary material for: Long-non Coding RNAs Related to Fat Deposition in Pigs Included lncRNA Corresponding to Human MALAT1
Source: Preprints.org preprint supplement (doi:10.20944/preprints202103.0356.v1), 2021-03-12
Supplement: Supplementary file 2 [file supplementary]

ENSSSCG000000047210

ENSSSCG000000051330

ENSSSCG000000048394

ENSSSCG000000047207

ENSSSCG000000047442

ENSSSCG000000041577

ENSSSCG000000003846

ENSSSCG000000048856

FoldChange

-5.10

5.10
