# Supplementary material for: Long-non Coding RNAs Related to Fat Deposition in Pigs Included lncRNA Corresponding to Human MALAT1
Source: Preprints.org preprint supplement (doi:10.20944/preprints202103.0356.v1), 2021-03-12
Supplement: Supplementary file 2 [file Table S2.xlsx]

## Sheet: stats_compilation
sample	written_reads_r1	skipped_short_reads_r1	written_reads_r2	skipped_short_reads_r2	processed_reads	skipped_due_to_uncalled_bases	trimmed_due_to_low_quality	short_prior_adapter_removal	finally_skipped_short_reads	skipped_paired_single_reads	discarded_reads_overall	remaining_reads	processed_bases	remaining_bases	number_of_input_reads	average_input_read_length	number_of_uniquely_mapped_reads	proc_of_uniquely_mapped_reads	average_mapped_length	total_number_of_splices	annotated_number_of_splices	number_of_splices_GT_AG	number_of_splices_GC_AG	number_of_splices_AT_AC	number_of_splices_non_canonical	proc_of_mismatch_rate_per_base	number_of_reads_mapped_to_multiple_loci	number_of_reads_mapped_to_too_many_loci	proc_of_reads_mapped_to_too_many_loci	number_of_reads_unmapped_too_many_mismatches	proc_of_reads_unmapped_too_many_mismatches	number_of_reads_unmapped_too_short	number_of_reads_unmapped_other	proc_of_reads_unmapped_other	INTRAGENIC_RATE	NUM_GAPS	EXONIC_RATE	GENES_DETECTED	MEAN_PER_BASE_COV	MAPPED	INTERGENIC_RATE	TOTAL_PURITY_FILTERED_READS_SEQUENCED	MEAN_CV	TRANSCRIPTS_DETECTED	CUMUL_GAP_LENGTH	GAP_PROC	UNPAIRED_READS	INTRONIC_RATE	EXPRESSION_PROFILING_EFFICIENCY
20065FL-01-02-01_S43_L005	30665287	159898	30665287	170906	62160820	263096	6839451	13	330804	236346	830246	61330574	9386283820	8358868946	30665287	272	21205621	69.15	270.38	18976544	18280037	18855571	96466	12233	12274	0.52	5229639	27058	0.09	190979	0.62	4006927	5063	0.02	0.8831996	21144	0.714029	12301	52.50643	53170592	0.116235	53170592	0.7424015	41985	4133924	0.113664046	0	0.16917	0.7140292
20065FL-01-02-02_S44_L005	28208403	155612	28208403	160198	57194330	242722	6082605	13	315810	218992	777524	56416806	8636343830	7767017604	28208403	275	19323450	68.5	272.74	17901015	17246675	17788816	89772	11157	11270	0.50	5330712	23660	0.08	164481	0.58	3361787	4313	0.02	0.867123	21101	0.697341	12210	48.47486	49568620	0.132308	49568620	0.75079054	41482	4366544	0.12045965	0	0.169782	0.69734126
20065FL-01-02-03_S45_L005	34323753	192233	34323753	198441	69606654	293558	7601562	17	390674	274916	959148	68647506	10510604754	9478535263	34323753	276	23709929	69.08	273.8	21978184	21151985	21840861	108486	13907	14930	0.49	6373656	29561	0.09	198668	0.58	4007614	4325	0.01	0.8692751	20167	0.697878	12455	-57.233837	60486192	0.130163	60486192	0.7317517	42466	3824590	0.103986606	0	0.171397	0.6978782
20065FL-01-02-04_S46_L005	31078276	144434	31078276	152745	62963814	267202	6333257	10	297179	242881	807262	62156552	9507535914	8555451320	31078276	275	22354126	71.93	272.74	21505264	20746864	21373818	104988	13880	12578	0.49	4819044	28717	0.09	177494	0.57	3694478	4417	0.01	0.89449984	21257	0.739705	12194	57.154285	54613081	0.104928	54613081	0.75926346	41510	4369931	0.12178296	0	0.154795	0.7397047
20065FL-01-02-06_S48_L005	28239245	142654	28239245	148475	57214068	242252	6414180	10	291129	202197	735578	56478490	8639324268	7793729375	28239245	275	17358141	61.47	272.88	15152452	14573948	15059720	71045	9860	11827	0.49	6000890	13606	0.05	148700	0.53	4715601	2307	0.01	0.8464957	22748	0.680651	12143	46.022877	46991281	0.153148	46991281	0.95332956	40854	5209488	0.1525382	0	0.165845	0.6806508
20065FL-01-02-07_S49_L005	32284930	219423	32284930	217785	65557184	275282	7233780	7	437208	274834	987324	64569860	9899134784	9035344267	32284930	279	23602150	73.11	277.78	22339687	21584366	22199377	112981	14469	12860	0.40	4998914	12421	0.04	163289	0.51	3505512	2644	0.01	0.8907277	19878	0.749938	12235	59.364555	57520235	0.108674	57520235	0.72985727	41812	4197989	0.11633816	0	0.14079	0.74993783
20065FL-01-02-08_S50_L005	29857079	134274	29857079	143321	60474798	254890	6442386	11	277595	228155	760640	59714158	9131694498	8230319255	29857079	275	21429258	71.77	273.3	19468022	18801927	19343844	100223	12355	11600	0.41	4276100	20323	0.07	147977	0.50	3979328	4093	0.01	0.8956936	20748	0.754846	12219	52.239685	51681977	0.103713	51681977	0.7289794	41581	4292556	0.11936058	0	0.140848	0.7548459
20065FL-01-02-09_S51_L005	28131831	131510	28131831	139000	57002008	242514	5697919	28	270510	225322	738346	56263662	8607303208	7780013437	28131831	276	19887273	70.69	274.03	18744111	18097069	18626148	93245	12068	12650	0.40	4647746	27985	0.10	138751	0.49	3425029	5047	0.02	0.8899683	21577	0.735834	12260	50.736156	49306650	0.109454	49306650	0.75296336	41833	4254367	0.11699987	0	0.154135	0.7358335
20065FL-01-02-10_S52_L005	33549760	147121	33549760	157427	67947038	289170	7180973	14	304548	253800	847518	67099520	10260002738	9223609118	33549760	274	21910188	65.31	271.86	18938422	18213970	18814694	95068	11900	16760	0.51	6964451	25522	0.08	201286	0.60	4443913	4400	0.01	0.85359234	20762	0.670617	12404	55.167126	58075520	0.145907	58075520	0.74622947	42293	4063814	0.11099573	0	0.182975	0.67061704
20065FL-01-02-11_S53_L005	26643967	118911	26643967	128880	53930358	228570	5855644	11	247791	166063	642424	53287934	8143484058	7249781297	26643967	272	13633107	51.17	268.88	11005852	10615880	10938279	52323	6642	8608	0.45	8919591	15036	0.06	125735	0.47	3947986	2512	0.01	0.80560255	23755	0.600844	11893	30.956734	45385745	0.194073	45385745	0.7714877	40016	5118221	0.14566262	0	0.204759	0.600844
20065FL-01-02-12_S54_L005	27680756	116199	27680756	129082	56042442	238962	5824377	11	245281	196687	680930	55361512	8462408742	7513177565	27680756	271	18322240	66.19	268.57	16797786	16186483	16694704	80355	10727	12000	0.50	5139210	15820	0.06	162522	0.59	4038224	2740	0.01	0.87131655	22088	0.699007	12190	46.105824	47197743	0.128218	47197743	0.77702844	41297	4642069	0.13117044	0	0.17231	0.69900686
20065FL-01-02-13_S55_L005	32557121	140918	32557121	154950	65933120	279308	6897185	33	295868	243702	818878	65114242	9955901120	8830097736	32557121	271	23292298	71.54	268.88	22162995	21406934	22026183	108971	13659	14182	0.49	4608752	16309	0.05	184284	0.57	4452122	3356	0.01	0.89454323	20651	0.739763	12467	59.330013	56098172	0.104889	56098172	0.7464589	42414	4038668	0.11292519	0	0.154781	0.73976266
20065FL-01-02-14_S56_L005	34182195	161864	34182195	179101	69257990	294368	7277396	21	340965	258267	893600	68364390	10457956490	9149699417	34182195	267	23610906	69.07	265.35	22311562	21481489	22173114	108515	14173	15760	0.48	4873116	28796	0.08	203565	0.60	5461357	4455	0.01	0.8888985	20422	0.728128	12462	-54.713955	57280504	0.110417	57280504	0.7287011	42615	3937739	0.10687028	0	0.160771	0.72812796
20065FL-01-02-15_S57_L005	33163001	147601	33163001	162390	67166986	284552	6918109	11	309991	246441	840984	66326002	10142214886	9031412792	33163001	272	21500484	64.83	269.04	19989515	19227369	19862231	99950	12077	15257	0.49	6770370	19051	0.06	201064	0.61	4668099	3933	0.01	0.84959	21092	0.665067	12465	54.44667	56874235	0.149817	56874235	0.7352201	42482	4207572	0.11488531	0	0.184523	0.6650668
20065FL-01-02-16_S58_L005	32365476	166185	32365476	177901	65602148	279308	6588933	13	344086	247802	871196	64730952	9905924348	8772286668	32365476	271	23228129	71.77	268.19	22142953	21268311	21999590	114224	14183	14956	0.47	4175062	26442	0.08	187744	0.58	4744001	4098	0.01	0.9013542	19850	0.750345	12622	-54.368458	55090097	0.097924	55090097	0.7178781	43119	3853001	0.105116464	0	0.151009	0.7503448
mean					6.25369e+07							61724144			30862072			67.7053																			0.708266				0.125991							0.165193
20065FL-01-02-05_S47_L005	28910338	90217	28910338	95384	58362370	247494	8100155	13	185601	108599	541694	57820676	8812717870	7984699659	28910338	276	8240143	28.5	269.3	2767164	2621591	2740902	14046	1370	10846	0.58	16297172	4340	0.02	161968	0.56	4205621	1094	0.00	0.57883614	38243	0.278341	11140	9.9004135	49497889	0.42105976	49497889	0.84410703	37591	6220285	0.16495906	0	0.3004953	0.27834088
sample that was removed from analysis
[truncated: 4 more columns]
