# Supplementary material for: Long-non Coding RNAs Related to Fat Deposition in Pigs Included lncRNA Corresponding to Human MALAT1
Source: Preprints.org preprint supplement (doi:10.20944/preprints202103.0356.v1), 2021-03-12
Supplement: Supplementary file 3 [file Table S3.xlsx]

## Sheet: GOTERM_BP_DIRECT_pos_cor
Category	Term	RT	Genes	Count	%	P-Value	Fisher Exact
	GOTERM_BP_DIRECT	positive regulation of cAMP metabolic process	RT	3	3.6	0.00029	1.8e-06
	GOTERM_BP_DIRECT	immune response	RT	8	9.5	0.0027	0.00062
	GOTERM_BP_DIRECT	response to vitamin D	RT	3	3.6	0.0029	6.9e-05
	GOTERM_BP_DIRECT	cell chemotaxis	RT	4	4.8	0.0031	0.00021
	GOTERM_BP_DIRECT	positive regulation of calcium-mediated signaling	RT	3	3.6	0.0036	9.6e-05
	GOTERM_BP_DIRECT	chemokine-mediated signaling pathway	RT	4	4.8	0.0039	0.0003
	GOTERM_BP_DIRECT	extracellular matrix disassembly	RT	4	4.8	0.0048	0.00039
	GOTERM_BP_DIRECT	oxidation-reduction process	RT	9	10.7	0.0048	0.0014
	GOTERM_BP_DIRECT	inflammatory response	RT	7	8.3	0.0069	0.0016
	GOTERM_BP_DIRECT	T cell differentiation	RT	3	3.6	0.0079	0.00033
	GOTERM_BP_DIRECT	mast cell cytokine production	RT	2	2.4	0.0089	2e-05
	GOTERM_BP_DIRECT	regulation of cell proliferation	RT	5	6	0.0094	0.0015
	GOTERM_BP_DIRECT	response to virus	RT	4	4.8	0.013	0.0016
	GOTERM_BP_DIRECT	regulation of developmental pigmentation	RT	2	2.4	0.018	0.00012
	GOTERM_BP_DIRECT	mitochondrial electron transport, NADH to ubiquinone	RT	3	3.6	0.02	0.0014
	GOTERM_BP_DIRECT	response to hydrogen peroxide	RT	3	3.6	0.022	0.0016
	GOTERM_BP_DIRECT	mast cell chemotaxis	RT	2	2.4	0.022	0.0002
	GOTERM_BP_DIRECT	mitochondrial respiratory chain complex I assembly	RT	3	3.6	0.032	0.0029
	GOTERM_BP_DIRECT	chromosome segregation	RT	3	3.6	0.037	0.0036
	GOTERM_BP_DIRECT	response to hypoxia	RT	4	4.8	0.042	0.0077
	GOTERM_BP_DIRECT	endothelial cell activation	RT	2	2.4	0.044	0.00089
	GOTERM_BP_DIRECT	ethanol oxidation	RT	2	2.4	0.052	0.0013
	GOTERM_BP_DIRECT	positive regulation of calcium ion transport into cytosol	RT	2	2.4	0.052	0.0013
	GOTERM_BP_DIRECT	positive regulation of cAMP-mediated signaling	RT	2	2.4	0.052	0.0013
	GOTERM_BP_DIRECT	cell adhesion	RT	6	7.1	0.054	0.018
	GOTERM_BP_DIRECT	mast cell degranulation	RT	2	2.4	0.057	0.0015
	GOTERM_BP_DIRECT	killing of cells of other organism	RT	2	2.4	0.061	0.0018
	GOTERM_BP_DIRECT	response to estradiol	RT	3	3.6	0.062	0.0081
	GOTERM_BP_DIRECT	male gonad development	RT	3	3.6	0.066	0.0089
	GOTERM_BP_DIRECT	transmembrane receptor protein tyrosine kinase signaling pathway	RT	3	3.6	0.069	0.0094
	GOTERM_BP_DIRECT	positive regulation of leukocyte chemotaxis	RT	2	2.4	0.077	0.003
	GOTERM_BP_DIRECT	response to ethanol	RT	3	3.6	0.08	0.012
	GOTERM_BP_DIRECT	cellular response to lipopolysaccharide	RT	3	3.6	0.091	0.015
	GOTERM_BP_DIRECT	positive regulation of JAK-STAT cascade	RT	2	2.4	0.094	0.0044

## Sheet: KEGG_Pathway_pos_cor
	Category	Term	RT	Genes	Count	%	P-Value	Fisher Exact
	KEGG_PATHWAY	Toll-like receptor signaling pathway	RT		5	6	0.0049	0.00066
	KEGG_PATHWAY	Parkinson's disease	RT		5	6	0.013	0.0024
	KEGG_PATHWAY	ECM-receptor interaction	RT		4	4.8	0.019	0.0026
	KEGG_PATHWAY	Metabolic pathways	RT		14	16.7	0.044	0.024
	KEGG_PATHWAY	Oxidative phosphorylation	RT		4	4.8	0.056	0.012
	KEGG_PATHWAY	Cytosolic DNA-sensing pathway	RT		3	3.6	0.065	0.0088
	KEGG_PATHWAY	Cytokine-cytokine receptor interaction	RT		5	6	0.073	0.022

## Sheet: GOTERM_BP_DIRECT_neg_cor
Category	Term	RT	Genes	Count	%	P-Value	Fisher Exact
	GOTERM_BP_DIRECT	cell adhesion	RT		15	13.5	1.1e-06	2.1e-07
	GOTERM_BP_DIRECT	extracellular matrix organization	RT		9	8.1	3.4e-05	4.5e-06
	GOTERM_BP_DIRECT	collagen catabolic process	RT		6	5.4	5.2e-05	3.2e-06
	GOTERM_BP_DIRECT	protein heterotrimerization	RT		4	3.6	8.5e-05	1.5e-06
	GOTERM_BP_DIRECT	response to lipopolysaccharide	RT		7	6.3	0.0006	8.6e-05
	GOTERM_BP_DIRECT	hydrogen peroxide biosynthetic process	RT		3	2.7	0.0014	2.1e-05
	GOTERM_BP_DIRECT	gluconeogenesis	RT		4	3.6	0.0027	0.00017
	GOTERM_BP_DIRECT	cellular response to amino acid stimulus	RT		4	3.6	0.0032	0.00023
	GOTERM_BP_DIRECT	oxidation-reduction process	RT		11	9.9	0.0042	0.0014
	GOTERM_BP_DIRECT	inflammatory response	RT		8	7.2	0.01	0.0029
	GOTERM_BP_DIRECT	response to antibiotic	RT		3	2.7	0.017	0.0011
	GOTERM_BP_DIRECT	cellular response to epidermal growth factor stimulus	RT		3	2.7	0.018	0.0012
	GOTERM_BP_DIRECT	cuticle development	RT		2	1.8	0.019	0.00012
	GOTERM_BP_DIRECT	transport	RT		7	6.3	0.023	0.0069
	GOTERM_BP_DIRECT	positive regulation of insulin secretion	RT		3	2.7	0.028	0.0022
	GOTERM_BP_DIRECT	radial glia guided migration of Purkinje cell	RT		2	1.8	0.031	0.0004
	GOTERM_BP_DIRECT	response to oxidative stress	RT		4	3.6	0.032	0.0054
	GOTERM_BP_DIRECT	cellular response to tumor necrosis factor	RT		4	3.6	0.032	0.0054
	GOTERM_BP_DIRECT	response to cAMP	RT		3	2.7	0.034	0.0031
	GOTERM_BP_DIRECT	intramembranous ossification	RT		2	1.8	0.037	0.00059
	GOTERM_BP_DIRECT	lung vasculature development	RT		2	1.8	0.037	0.00059
	GOTERM_BP_DIRECT	proteolysis	RT		8	7.2	0.039	0.015
	GOTERM_BP_DIRECT	bone trabecula formation	RT		2	1.8	0.049	0.0011
	GOTERM_BP_DIRECT	regulation of type B pancreatic cell proliferation	RT		2	1.8	0.049	0.0011
	GOTERM_BP_DIRECT	amine metabolic process	RT		2	1.8	0.049	0.0011
	GOTERM_BP_DIRECT	angiogenesis	RT		5	4.5	0.053	0.014
	GOTERM_BP_DIRECT	skin morphogenesis	RT		2	1.8	0.055	0.0014
	GOTERM_BP_DIRECT	regulation of keratinocyte differentiation	RT		2	1.8	0.061	0.0018
	GOTERM_BP_DIRECT	cellular response to peptide	RT		2	1.8	0.067	0.0021
	GOTERM_BP_DIRECT	endothelial cell differentiation	RT		2	1.8	0.067	0.0021
	GOTERM_BP_DIRECT	androgen biosynthetic process	RT		2	1.8	0.067	0.0021
	GOTERM_BP_DIRECT	endothelial cell morphogenesis	RT		2	1.8	0.067	0.0021
	GOTERM_BP_DIRECT	hormone biosynthetic process	RT		2	1.8	0.073	0.0025
	GOTERM_BP_DIRECT	thyroid hormone generation	RT		2	1.8	0.073	0.0025
	GOTERM_BP_DIRECT	oxaloacetate metabolic process	RT		2	1.8	0.073	0.0025
	GOTERM_BP_DIRECT	fat cell differentiation	RT		3	2.7	0.078	0.011
	GOTERM_BP_DIRECT	cytoskeleton organization	RT		4	3.6	0.082	0.02
	GOTERM_BP_DIRECT	BMP signaling pathway	RT		3	2.7	0.083	0.013
	GOTERM_BP_DIRECT	aging	RT		4	3.6	0.087	0.021
	GOTERM_BP_DIRECT	negative regulation of inflammatory response	RT		3	2.7	0.089	0.014
	GOTERM_BP_DIRECT	neurotrophin TRK receptor signaling pathway	RT		2	1.8	0.096	0.0046

## Sheet: KEGG_Pathways_neg_cor
Category	Term	RT	Genes	Count	%	P-Value	Fisher Exact
	KEGG_PATHWAY	Protein digestion and absorption	RT		7	6.3	4.2e-05	3.7e-06
	KEGG_PATHWAY	Proximal tubule bicarbonate reclamation	RT		4	3.6	0.00061	2.3e-05
	KEGG_PATHWAY	PI3K-Akt signaling pathway	RT		10	9	0.00085	0.00021
	KEGG_PATHWAY	ECM-receptor interaction	RT		5	4.5	0.0038	0.00047
	KEGG_PATHWAY	Focal adhesion	RT		6	5.4	0.018	0.0043
	KEGG_PATHWAY	Steroid hormone biosynthesis	RT		3	2.7	0.068	0.0094
	KEGG_PATHWAY	PPAR signaling pathway	RT		3	2.7	0.088	0.014

## Sheet: STRING functional analysis
#term ID	term description	observed gene count	background gene count	false discovery rate	matching proteins in your network (IDs)	matching proteins in your network (labels)
HSA-1474228	Degradation of the extracellular matrix	12	139	1.78e-05	9606.ENSP00000219070,9606.ENSP00000225964,9606.ENSP00000282849,9606.ENSP00000295550,9606.ENSP00000300527,9606.ENSP00000323929,9606.ENSP00000354080,9606.ENSP00000355180,9606.ENSP00000355837,9606.ENSP00000361405,9606.ENSP00000378340,9606.ENSP00000378517	MMP2,COL1A1,ADAMTS18,COL6A3,COL6A2,A2M,SCUBE1,COL6A1,CAPN8,MMP9,COL4A6,SPP1
HSA-1474244	Extracellular matrix organization	16	298	2.54e-05	9606.ENSP00000219070,9606.ENSP00000223061,9606.ENSP00000225964,9606.ENSP00000265131,9606.ENSP00000282849,9606.ENSP00000295550,9606.ENSP00000300527,9606.ENSP00000323929,9606.ENSP00000354080,9606.ENSP00000354360,9606.ENSP00000355180,9606.ENSP00000355837,9606.ENSP00000357668,9606.ENSP00000361405,9606.ENSP00000378340,9606.ENSP00000378517	MMP2,PCOLCE,COL1A1,TNC,ADAMTS18,COL6A3,COL6A2,A2M,SCUBE1,LAMC3,COL6A1,CAPN8,ADAM12,MMP9,COL4A6,SPP1
HSA-2022090	Assembly of collagen fibrils and other multimeric structures	7	60	0.00073	9606.ENSP00000223061,9606.ENSP00000225964,9606.ENSP00000295550,9606.ENSP00000300527,9606.ENSP00000355180,9606.ENSP00000361405,9606.ENSP00000378340	PCOLCE,COL1A1,COL6A3,COL6A2,COL6A1,MMP9,COL4A6
HSA-1442490	Collagen degradation	7	64	0.00081	9606.ENSP00000219070,9606.ENSP00000225964,9606.ENSP00000295550,9606.ENSP00000300527,9606.ENSP00000355180,9606.ENSP00000361405,9606.ENSP00000378340	MMP2,COL1A1,COL6A3,COL6A2,COL6A1,MMP9,COL4A6
HSA-216083	Integrin cell surface interactions	7	83	0.0031	9606.ENSP00000225964,9606.ENSP00000265131,9606.ENSP00000295550,9606.ENSP00000300527,9606.ENSP00000355180,9606.ENSP00000378340,9606.ENSP00000378517	COL1A1,TNC,COL6A3,COL6A2,COL6A1,COL4A6,SPP1
hsa04512	ECM-receptor interaction	9	81	5.02e-05	9606.ENSP00000225964,9606.ENSP00000265131,9606.ENSP00000295550,9606.ENSP00000300527,9606.ENSP00000354360,9606.ENSP00000355180,9606.ENSP00000377492,9606.ENSP00000378340,9606.ENSP00000378517	COL1A1,TNC,COL6A3,COL6A2,LAMC3,COL6A1,HMMR,COL4A6,SPP1
hsa04151	PI3K-Akt signaling pathway	14	348	0.0015	9606.ENSP00000172229,9606.ENSP00000216780,9606.ENSP00000225964,9606.ENSP00000265131,9606.ENSP00000288135,9606.ENSP00000295550,9606.ENSP00000300527,9606.ENSP00000317272,9606.ENSP00000319814,9606.ENSP00000354360,9606.ENSP00000355180,9606.ENSP00000369293,9606.ENSP00000378340,9606.ENSP00000378517	NGFR,PCK2,COL1A1,TNC,KIT,COL6A3,COL6A2,MET,PCK1,LAMC3,COL6A1,IL2RA,COL4A6,SPP1
hsa04974	Protein digestion and absorption	7	90	0.0031	9606.ENSP00000225964,9606.ENSP00000295550,9606.ENSP00000300527,9606.ENSP00000355180,9606.ENSP00000378340,9606.ENSP00000418525,9606.ENSP00000445306	COL1A1,COL6A3,COL6A2,COL6A1,COL4A6,MME,ATP1A1
hsa04964	Proximal tubule bicarbonate reclamation	4	23	0.0063	9606.ENSP00000216780,9606.ENSP00000300900,9606.ENSP00000319814,9606.ENSP00000445306	PCK2,CA4,PCK1,ATP1A1
GO:1901700	response to oxygen-containing compound	44	1427	9.05e-08	9606.ENSP00000011653,9606.ENSP00000172229,9606.ENSP00000219070,9606.ENSP00000225328,9606.ENSP00000225964,9606.ENSP00000238738,9606.ENSP00000254079,9606.ENSP00000262406,9606.ENSP00000262746,9606.ENSP00000265131,9606.ENSP00000265717,9606.ENSP00000274192,9606.ENSP00000297991,9606.ENSP00000300527,9606.ENSP00000305651,9606.ENSP00000307023,9606.ENSP00000312652,9606.ENSP00000317997,9606.ENSP00000319814,…	CD4,NGFR,MMP2,P2RX5,COL1A1,RHOQ,PPP1R1B,RGS9,PRDX1,TNC,PRKAR2B,SRD5A1,AQP3,COL6A2,CXCL10,KLF11,LEP,DUOX1,PCK1,SLPI,APOD,MT-ND6,MT-ND1,CXCL9,COL6A1,S100A14,RBP4,MMP9,ID1,SLC2A5,ERRFI1,PRNP,CYP1A1,POSTN,CNP,SPP1,GRB10,TBXA2R,CLDN4,CXCL2,CRYAB,ATP1A1,DUOX2,NR4A3
GO:0030198	extracellular matrix organization	19	296	6.67e-07	9606.ENSP00000206423,9606.ENSP00000219070,9606.ENSP00000225964,9606.ENSP00000265131,9606.ENSP00000284322,9606.ENSP00000295550,9606.ENSP00000300527,9606.ENSP00000323929,9606.ENSP00000354080,9606.ENSP00000354360,9606.ENSP00000355180,9606.ENSP00000356791,9606.ENSP00000357668,9606.ENSP00000359219,9606.ENSP00000361405,9606.ENSP00000369071,9606.ENSP00000378340,9606.ENSP00000378517,9606.ENSP00000381581	CCDC80,MMP2,COL1A1,TNC,ABI3BP,COL6A3,COL6A2,A2M,SCUBE1,LAMC3,COL6A1,DPT,ADAM12,KAZALD1,MMP9,POSTN,COL4A6,SPP1,LCP1
GO:0010033	response to organic substance	62	2815	1.06e-06	9606.ENSP00000011653,9606.ENSP00000172229,9606.ENSP00000219070,9606.ENSP00000223061,9606.ENSP00000225328,9606.ENSP00000225964,9606.ENSP00000238738,9606.ENSP00000253778,9606.ENSP00000254079,9606.ENSP00000254322,9606.ENSP00000261883,9606.ENSP00000262406,9606.ENSP00000265131,9606.ENSP00000265717,9606.ENSP00000274192,9606.ENSP00000288135,9606.ENSP00000297991,9606.ENSP00000300527,9606.ENSP00000305651,…	CD4,NGFR,MMP2,PCOLCE,P2RX5,COL1A1,RHOQ,GFPT2,PPP1R1B,DNAJB1,CILP,RGS9,TNC,PRKAR2B,SRD5A1,KIT,AQP3,COL6A2,CXCL10,KLF11,HSPA6,LEP,DUOX1,MALT1,PCK1,HAP1,SLPI,OAS2,ATF3,MT-ND6,MT-ND1,CXCL9,COL6A1,S100A14,DHCR24,RBP4,MMP9,LCN2,ID1,SLC2A5,ERRFI1,CNTFR,PRNP,CYP1A1,POSTN,IL2RA,CNP,SPP1,IRF7,LCP1,GRB10,TBXA2R,CLDN4,MME,CXCL2,CRYAB,ATP1A1,GDF10,TMEM100,DUOX2,NR4A3,CCL4
GO:0042221	response to chemical	77	4153	6.17e-06	9606.ENSP00000011653,9606.ENSP00000172229,9606.ENSP00000216492,9606.ENSP00000219070,9606.ENSP00000223061,9606.ENSP00000225328,9606.ENSP00000225964,9606.ENSP00000238738,9606.ENSP00000253778,9606.ENSP00000254079,9606.ENSP00000254322,9606.ENSP00000261883,9606.ENSP00000262406,9606.ENSP00000262746,9606.ENSP00000265131,9606.ENSP00000265717,9606.ENSP00000266058,9606.ENSP00000274192,9606.ENSP00000275300,…	CD4,NGFR,CHGA,MMP2,PCOLCE,P2RX5,COL1A1,RHOQ,GFPT2,PPP1R1B,DNAJB1,CILP,RGS9,PRDX1,TNC,PRKAR2B,SLIT1,SRD5A1,SLC22A3,KIT,CHRNE,AQP3,COL6A2,CXCL10,KLF11,SLC5A6,HSPA6,AOC3,LEP,MET,DUOX1,MALT1,PCK1,HAP1,SLPI,OAS2,ATF3,APOD,CES1,MT-ND6,MT-ND1,CXCL9,COL6A1,FMO3,S100A14,DAB1,DHCR24,RBP4,ADIRF,MMP9,LCN2,ID1,SLC2A5,ERRFI1,CNTFR,PRNP,CYP1A1,POSTN,IL2RA,CNP,SPP1,IRF7,LCP1,GRB10,TBXA2R,CLDN4,MME,CXCL2,CRYAB,RA…
GO:0009636	response to toxic substance	20	468	5.35e-05	9606.ENSP00000225964,9606.ENSP00000254079,9606.ENSP00000262406,9606.ENSP00000262746,9606.ENSP00000265131,9606.ENSP00000274192,9606.ENSP00000293780,9606.ENSP00000312652,9606.ENSP00000317997,9606.ENSP00000353720,9606.ENSP00000354665,9606.ENSP00000360522,9606.ENSP00000361083,9606.ENSP00000369050,9606.ENSP00000377470,9606.ENSP00000393333,9606.ENSP00000433560,9606.ENSP00000475084,9606.ENSP00000482027,…	COL1A1,PPP1R1B,RGS9,PRDX1,TNC,SRD5A1,CHRNE,LEP,DUOX1,CES1,MT-ND6,RBP4,ADIRF,CYP1A1,CNP,TBXA2R,CRYAB,DUOX2,NR4A3,CCL4
GO:0033273	response to vitamin	9	87	0.00024	9606.ENSP00000011653,9606.ENSP00000225964,9606.ENSP00000265131,9606.ENSP00000297991,9606.ENSP00000305651,9606.ENSP00000312652,9606.ENSP00000369050,9606.ENSP00000369071,9606.ENSP00000378517	CD4,COL1A1,TNC,AQP3,CXCL10,LEP,CYP1A1,POSTN,SPP1
GO:0042493	response to drug	27	900	0.00024	9606.ENSP00000225328,9606.ENSP00000225964,9606.ENSP00000254079,9606.ENSP00000262406,9606.ENSP00000265131,9606.ENSP00000265717,9606.ENSP00000274192,9606.ENSP00000275300,9606.ENSP00000293780,9606.ENSP00000310208,9606.ENSP00000312652,9606.ENSP00000345179,9606.ENSP00000354665,9606.ENSP00000354687,9606.ENSP00000360280,9606.ENSP00000360522,9606.ENSP00000361083,9606.ENSP00000365280,9606.ENSP00000366702,…	P2RX5,COL1A1,PPP1R1B,RGS9,TNC,PRKAR2B,SRD5A1,SLC22A3,CHRNE,SLC5A6,LEP,APOD,MT-ND6,MT-ND1,DAB1,RBP4,ADIRF,ID1,ERRFI1,PRNP,CYP1A1,TBXA2R,CLDN4,CRYAB,ATP1A1,ABCA8,NR4A3
GO:0009605	response to external stimulus	46	2152	0.00025	9606.ENSP00000011653,9606.ENSP00000172229,9606.ENSP00000206423,9606.ENSP00000216492,9606.ENSP00000225328,9606.ENSP00000225964,9606.ENSP00000262746,9606.ENSP00000263863,9606.ENSP00000265131,9606.ENSP00000266058,9606.ENSP00000274192,9606.ENSP00000275300,9606.ENSP00000288135,9606.ENSP00000297991,9606.ENSP00000305651,9606.ENSP00000312652,9606.ENSP00000317272,9606.ENSP00000319279,9606.ENSP00000319814,…	CD4,NGFR,CCDC80,CHGA,P2RX5,COL1A1,PRDX1,GNLY,TNC,SLIT1,SRD5A1,SLC22A3,KIT,AQP3,CXCL10,LEP,MET,MALT1,PCK1,C7,VWCE,PPL,SLPI,OAS2,ATF3,PGLYRP2,CXCL9,S100A14,DAB1,LCN2,SMPDL3B,CYP1A1,POSTN,CNP,SPP1,IRF7,GRB10,CTNNA2,TBXA2R,C4A,CXCL2,RAP1GAP,ATP1A1,DUOX2,NR4A3,CCL4
GO:0014070	response to organic cyclic compound	26	873	0.00034	9606.ENSP00000011653,9606.ENSP00000225328,9606.ENSP00000225964,9606.ENSP00000254079,9606.ENSP00000262406,9606.ENSP00000265131,9606.ENSP00000265717,9606.ENSP00000274192,9606.ENSP00000297991,9606.ENSP00000305651,9606.ENSP00000312652,9606.ENSP00000317997,9606.ENSP00000319814,9606.ENSP00000354665,9606.ENSP00000354687,9606.ENSP00000365280,9606.ENSP00000366702,9606.ENSP00000369050,9606.ENSP00000369071,…	CD4,P2RX5,COL1A1,PPP1R1B,RGS9,TNC,PRKAR2B,SRD5A1,AQP3,CXCL10,LEP,DUOX1,PCK1,MT-ND6,MT-ND1,ID1,ERRFI1,CYP1A1,POSTN,SPP1,TBXA2R,CLDN4,CRYAB,ATP1A1,DUOX2,NR4A3
GO:0033993	response to lipid	25	825	0.00038	9606.ENSP00000011653,9606.ENSP00000172229,9606.ENSP00000225964,9606.ENSP00000262406,9606.ENSP00000265131,9606.ENSP00000274192,9606.ENSP00000297991,9606.ENSP00000305651,9606.ENSP00000312652,9606.ENSP00000319814,9606.ENSP00000342082,9606.ENSP00000354901,9606.ENSP00000357691,9606.ENSP00000360522,9606.ENSP00000366702,9606.ENSP00000369050,9606.ENSP00000369071,9606.ENSP00000377470,9606.ENSP00000378517,…	CD4,NGFR,COL1A1,RGS9,TNC,SRD5A1,AQP3,CXCL10,LEP,PCK1,SLPI,CXCL9,S100A14,RBP4,ERRFI1,CYP1A1,POSTN,CNP,SPP1,TBXA2R,CLDN4,CXCL2,CRYAB,ATP1A1,NR4A3
GO:0007155	cell adhesion	25	843	0.00047	9606.ENSP00000011653,9606.ENSP00000243347,9606.ENSP00000249842,9606.ENSP00000265131,9606.ENSP00000266546,9606.ENSP00000288135,9606.ENSP00000295550,9606.ENSP00000300527,9606.ENSP00000312326,9606.ENSP00000312652,9606.ENSP00000354360,9606.ENSP00000355180,9606.ENSP00000356791,9606.ENSP00000357668,9606.ENSP00000360280,9606.ENSP00000365280,9606.ENSP00000367794,9606.ENSP00000369071,9606.ENSP00000378340,…	CD4,TNFAIP6,ISLR,TNC,CLSTN3,KIT,COL6A3,COL6A2,AOC3,LEP,LAMC3,COL6A1,DPT,ADAM12,DAB1,ID1,SRPX,POSTN,COL4A6,SPP1,CTNNA2,CLDN4,CNTN1,SPON1,CCL4
GO:0042445	hormone metabolic process	11	186	0.00083	9606.ENSP00000274192,9606.ENSP00000312652,9606.ENSP00000317997,9606.ENSP00000358421,9606.ENSP00000360522,9606.ENSP00000369050,9606.ENSP00000378517,9606.ENSP00000418525,9606.ENSP00000451406,9606.ENSP00000475084,9606.ENSP00000482841	SRD5A1,LEP,DUOX1,HSD3B1,RBP4,CYP1A1,SPP1,MME,HSD17B6,DUOX2,CRABP2
GO:0006950	response to stress	57	3267	0.0020	9606.ENSP00000011653,9606.ENSP00000172229,9606.ENSP00000216492,9606.ENSP00000219070,9606.ENSP00000225328,9606.ENSP00000225964,9606.ENSP00000243347,9606.ENSP00000254322,9606.ENSP00000262746,9606.ENSP00000263863,9606.ENSP00000265131,9606.ENSP00000265717,9606.ENSP00000274192,9606.ENSP00000284440,9606.ENSP00000288135,9606.ENSP00000297991,9606.ENSP00000305651,9606.ENSP00000310219,9606.ENSP00000312326,…	CD4,NGFR,CHGA,MMP2,P2RX5,COL1A1,TNFAIP6,DNAJB1,PRDX1,GNLY,TNC,PRKAR2B,SRD5A1,UCHL1,KIT,AQP3,CXCL10,HSPA6,AOC3,LEP,BOK,DUOX1,MALT1,PCK1,C7,A2M,APOLD1,SLPI,OAS2,ATF3,APOD,PGLYRP2,SCUBE1,MT-ND6,MT-ND1,CXCL9,S100A14,DHCR24,MMP9,LCN2,SMPDL3B,ERRFI1,SRPX,PRNP,CYP1A1,POSTN,IL2RA,SPP1,IRF7,TBXA2R,C4A,TOP2A,CXCL2,CRYAB,DUOX2,NR4A3,CCL4
GO:0007584	response to nutrient	11	208	0.0020	9606.ENSP00000011653,9606.ENSP00000225328,9606.ENSP00000225964,9606.ENSP00000265131,9606.ENSP00000297991,9606.ENSP00000305651,9606.ENSP00000312652,9606.ENSP00000369050,9606.ENSP00000369071,9606.ENSP00000378517,9606.ENSP00000393333	CD4,P2RX5,COL1A1,TNC,AQP3,CXCL10,LEP,CYP1A1,POSTN,SPP1,TBXA2R
GO:0033280	response to vitamin D	5	30	0.0032	9606.ENSP00000011653,9606.ENSP00000265131,9606.ENSP00000297991,9606.ENSP00000305651,9606.ENSP00000378517	CD4,TNC,AQP3,CXCL10,SPP1
GO:0009617	response to bacterium	17	555	0.0064	9606.ENSP00000011653,9606.ENSP00000172229,9606.ENSP00000206423,9606.ENSP00000216492,9606.ENSP00000263863,9606.ENSP00000305651,9606.ENSP00000319279,9606.ENSP00000319814,9606.ENSP00000342082,9606.ENSP00000342278,9606.ENSP00000345968,9606.ENSP00000354901,9606.ENSP00000357691,9606.ENSP00000369050,9606.ENSP00000377470,9606.ENSP00000393333,9606.ENSP00000427279	CD4,NGFR,CCDC80,CHGA,GNLY,CXCL10,MALT1,PCK1,SLPI,OAS2,PGLYRP2,CXCL9,S100A14,CYP1A1,CNP,TBXA2R,CXCL2
GO:0034754	cellular hormone metabolic process	7	109	0.0109	9606.ENSP00000274192,9606.ENSP00000358421,9606.ENSP00000360522,9606.ENSP00000369050,9606.ENSP00000378517,9606.ENSP00000451406,9606.ENSP00000482841	SRD5A1,HSD3B1,RBP4,CYP1A1,SPP1,HSD17B6,CRABP2
GO:0008209	androgen metabolic process	4	28	0.0150	9606.ENSP00000274192,9606.ENSP00000358421,9606.ENSP00000378517,9606.ENSP00000451406	SRD5A1,HSD3B1,SPP1,HSD17B6
GO:0006959	humoral immune response	10	252	0.0158	9606.ENSP00000216492,9606.ENSP00000263863,9606.ENSP00000305651,9606.ENSP00000322061,9606.ENSP00000342082,9606.ENSP00000345968,9606.ENSP00000354901,9606.ENSP00000362108,9606.ENSP00000396688,9606.ENSP00000427279	CHGA,GNLY,CXCL10,C7,SLPI,PGLYRP2,CXCL9,LCN2,C4A,CXCL2
GO:0006702	androgen biosynthetic process	3	11	0.0162	9606.ENSP00000274192,9606.ENSP00000358421,9606.ENSP00000451406	SRD5A1,HSD3B1,HSD17B6
GO:0032355	response to estradiol	7	126	0.0173	9606.ENSP00000011653,9606.ENSP00000225964,9606.ENSP00000262406,9606.ENSP00000274192,9606.ENSP00000312652,9606.ENSP00000369071,9606.ENSP00000433560	CD4,COL1A1,RGS9,SRD5A1,LEP,POSTN,CRYAB
GO:0006629	lipid metabolic process	25	1192	0.0191	9606.ENSP00000253382,9606.ENSP00000265717,9606.ENSP00000274192,9606.ENSP00000281382,9606.ENSP00000288135,9606.ENSP00000312652,9606.ENSP00000317272,9606.ENSP00000319814,9606.ENSP00000345179,9606.ENSP00000349687,9606.ENSP00000353720,9606.ENSP00000358421,9606.ENSP00000360316,9606.ENSP00000360522,9606.ENSP00000360687,9606.ENSP00000363001,9606.ENSP00000367747,9606.ENSP00000369050,9606.ENSP00000370748,…	ACSS2,PRKAR2B,SRD5A1,PIGF,KIT,LEP,MET,PCK1,APOD,GM2A,CES1,HSD3B1,DHCR24,RBP4,PTGDS,SMPDL3B,PLCH2,CYP1A1,IDI1,SPP1,GK,ECHDC1,HSD17B6,CYP4F8,CRABP2
GO:0006954	inflammatory response	14	482	0.0193	9606.ENSP00000172229,9606.ENSP00000243347,9606.ENSP00000288135,9606.ENSP00000305651,9606.ENSP00000312326,9606.ENSP00000354080,9606.ENSP00000354901,9606.ENSP00000363001,9606.ENSP00000369293,9606.ENSP00000378517,9606.ENSP00000393333,9606.ENSP00000396688,9606.ENSP00000427279,9606.ENSP00000482259	NGFR,TNFAIP6,KIT,CXCL10,AOC3,SCUBE1,CXCL9,SMPDL3B,IL2RA,SPP1,TBXA2R,C4A,CXCL2,CCL4
GO:0009725	response to hormone	20	854	0.0193	9606.ENSP00000011653,9606.ENSP00000225964,9606.ENSP00000238738,9606.ENSP00000262406,9606.ENSP00000265131,9606.ENSP00000265717,9606.ENSP00000274192,9606.ENSP00000288135,9606.ENSP00000312652,9606.ENSP00000319814,9606.ENSP00000360316,9606.ENSP00000366702,9606.ENSP00000369071,9606.ENSP00000378517,9606.ENSP00000381793,9606.ENSP00000393333,9606.ENSP00000409544,9606.ENSP00000433560,9606.ENSP00000445306,…	CD4,COL1A1,RHOQ,RGS9,TNC,PRKAR2B,SRD5A1,KIT,LEP,PCK1,DHCR24,ERRFI1,POSTN,SPP1,GRB10,TBXA2R,CLDN4,CRYAB,ATP1A1,NR4A3
GO:0006979	response to oxidative stress	12	373	0.0198	9606.ENSP00000225964,9606.ENSP00000262746,9606.ENSP00000317997,9606.ENSP00000345179,9606.ENSP00000354665,9606.ENSP00000354687,9606.ENSP00000360316,9606.ENSP00000361405,9606.ENSP00000368752,9606.ENSP00000433560,9606.ENSP00000475084,9606.ENSP00000482027	COL1A1,PRDX1,DUOX1,APOD,MT-ND6,MT-ND1,DHCR24,MMP9,PRNP,CRYAB,DUOX2,NR4A3
GO:0042446	hormone biosynthetic process	5	62	0.0210	9606.ENSP00000274192,9606.ENSP00000317997,9606.ENSP00000358421,9606.ENSP00000451406,9606.ENSP00000475084	SRD5A1,DUOX1,HSD3B1,HSD17B6,DUOX2
GO:0060587	regulation of lipoprotein lipid oxidation	2	2	0.0222	9606.ENSP00000312652,9606.ENSP00000345179	LEP,APOD
GO:0006071	glycerol metabolic process	3	17	0.0322	9606.ENSP00000312652,9606.ENSP00000319814,9606.ENSP00000401720	LEP,PCK1,GK
GO:0006955	immune response	29	1560	0.0325	9606.ENSP00000011653,9606.ENSP00000172229,9606.ENSP00000216492,9606.ENSP00000243347,9606.ENSP00000262746,9606.ENSP00000263863,9606.ENSP00000288135,9606.ENSP00000305651,9606.ENSP00000310219,9606.ENSP00000319279,9606.ENSP00000322061,9606.ENSP00000341867,9606.ENSP00000342082,9606.ENSP00000342278,9606.ENSP00000345968,9606.ENSP00000349687,9606.ENSP00000354901,9606.ENSP00000361405,9606.ENSP00000362108,…	CD4,NGFR,CHGA,TNFAIP6,PRDX1,GNLY,KIT,CXCL10,HSPA6,MALT1,C7,SH2D6,SLPI,OAS2,PGLYRP2,GM2A,CXCL9,MMP9,LCN2,SMPDL3B,SLC2A5,IL2RA,IRF7,LCP1,C4A,MME,CXCL2,NR4A3,CCL4
GO:0032496	response to lipopolysaccharide	10	298	0.0328	9606.ENSP00000172229,9606.ENSP00000305651,9606.ENSP00000319814,9606.ENSP00000342082,9606.ENSP00000354901,9606.ENSP00000357691,9606.ENSP00000369050,9606.ENSP00000377470,9606.ENSP00000393333,9606.ENSP00000427279	NGFR,CXCL10,PCK1,SLPI,CXCL9,S100A14,CYP1A1,CNP,TBXA2R,CXCL2
GO:0008202	steroid metabolic process	9	248	0.0332	9606.ENSP00000274192,9606.ENSP00000312652,9606.ENSP00000353720,9606.ENSP00000358421,9606.ENSP00000360316,9606.ENSP00000369050,9606.ENSP00000370748,9606.ENSP00000378517,9606.ENSP00000451406	SRD5A1,LEP,CES1,HSD3B1,DHCR24,CYP1A1,IDI1,SPP1,HSD17B6
GO:0006006	glucose metabolic process	6	113	0.0360	9606.ENSP00000216780,9606.ENSP00000312652,9606.ENSP00000319814,9606.ENSP00000344352,9606.ENSP00000345179,9606.ENSP00000360522	PCK2,LEP,PCK1,ATF3,APOD,RBP4
GO:0006710	androgen catabolic process	2	4	0.0389	9606.ENSP00000378517,9606.ENSP00000451406	SPP1,HSD17B6
GO:0006094	gluconeogenesis	4	46	0.0394	9606.ENSP00000216780,9606.ENSP00000319814,9606.ENSP00000344352,9606.ENSP00000360522	PCK2,PCK1,ATF3,RBP4
GO:0044255	cellular lipid metabolic process	20	946	0.0395	9606.ENSP00000253382,9606.ENSP00000265717,9606.ENSP00000274192,9606.ENSP00000281382,9606.ENSP00000288135,9606.ENSP00000312652,9606.ENSP00000317272,9606.ENSP00000319814,9606.ENSP00000349687,9606.ENSP00000353720,9606.ENSP00000360522,9606.ENSP00000360687,9606.ENSP00000363001,9606.ENSP00000367747,9606.ENSP00000369050,9606.ENSP00000370748,9606.ENSP00000401720,9606.ENSP00000436585,9606.ENSP00000477567,…	ACSS2,PRKAR2B,SRD5A1,PIGF,KIT,LEP,MET,PCK1,GM2A,CES1,RBP4,PTGDS,SMPDL3B,PLCH2,CYP1A1,IDI1,GK,ECHDC1,CYP4F8,CRABP2
GO:0010827	regulation of glucose transmembrane transport	5	84	0.0437	9606.ENSP00000172229,9606.ENSP00000238738,9606.ENSP00000312652,9606.ENSP00000381793,9606.ENSP00000482027	NGFR,RHOQ,LEP,GRB10,NR4A3
GO:0006694	steroid biosynthetic process	6	126	0.0447	9606.ENSP00000274192,9606.ENSP00000353720,9606.ENSP00000358421,9606.ENSP00000360316,9606.ENSP00000370748,9606.ENSP00000451406	SRD5A1,CES1,HSD3B1,DHCR24,IDI1,HSD17B6
GO:0010817	regulation of hormone levels	13	511	0.0472	9606.ENSP00000062104,9606.ENSP00000274192,9606.ENSP00000312652,9606.ENSP00000317997,9606.ENSP00000358421,9606.ENSP00000360522,9606.ENSP00000369050,9606.ENSP00000378517,9606.ENSP00000418525,9606.ENSP00000445306,9606.ENSP00000451406,9606.ENSP00000475084,9606.ENSP00000482841	NNAT,SRD5A1,LEP,DUOX1,HSD3B1,RBP4,CYP1A1,SPP1,MME,ATP1A1,HSD17B6,DUOX2,CRABP2
