# Supplementary figures and images for: Long-non Coding RNAs Related to Fat Deposition in Pigs Included lncRNA Corresponding to Human MALAT1
Source: Preprints.org preprint supplement (doi:10.20944/preprints202103.0356.v1), 2021-03-12

ENSSSCG000000047210

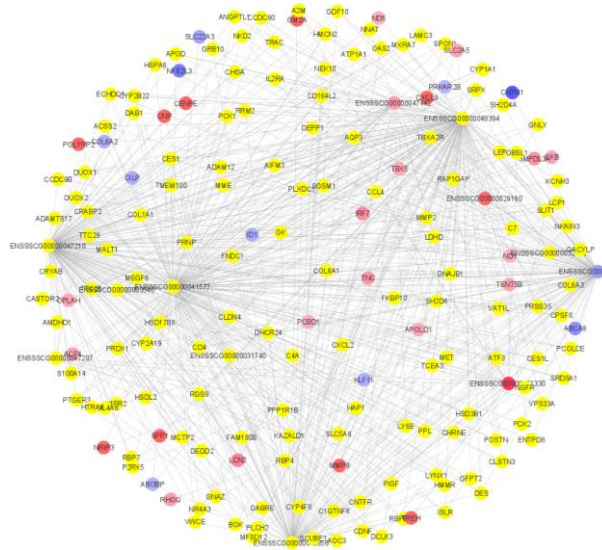

ENSSSCG000000051330

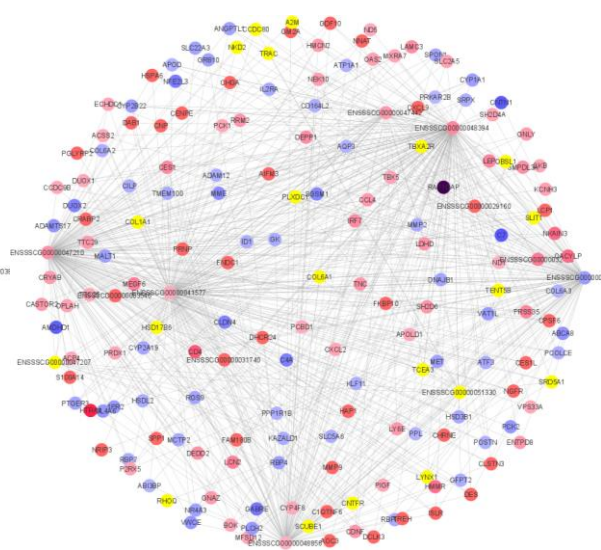

ENSSSCG000000048394

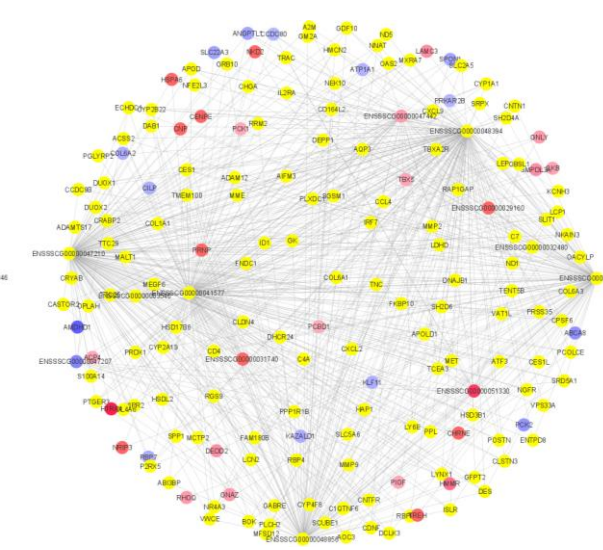

ENSSSCG000000047207

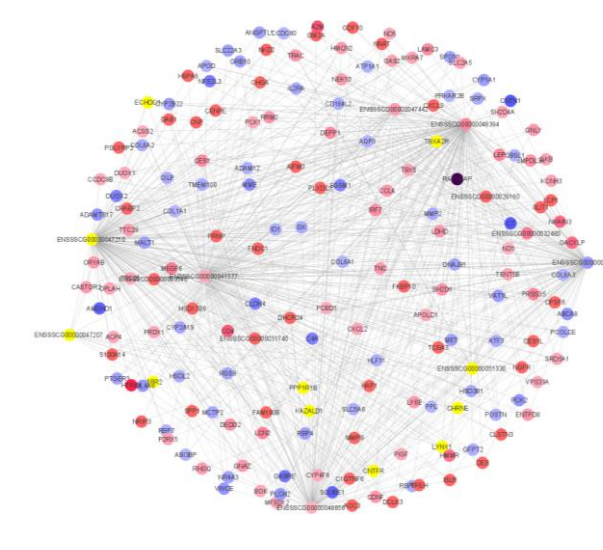

ENSSSCG000000047442

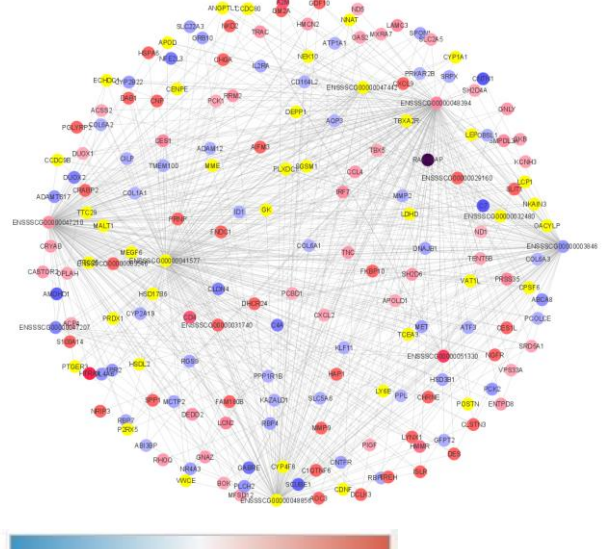

ENSSSCG000000041577

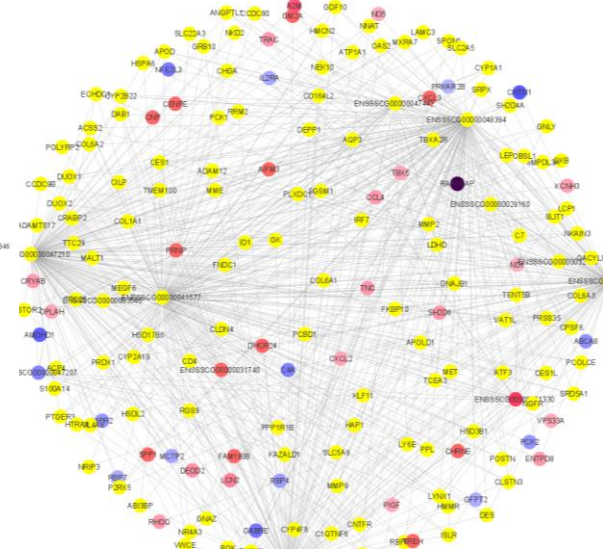

ENSSSCG000000003846

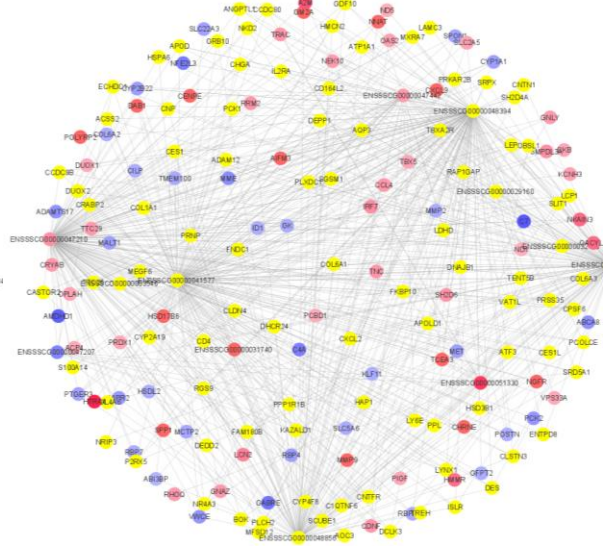

ENSSSCG000000048856

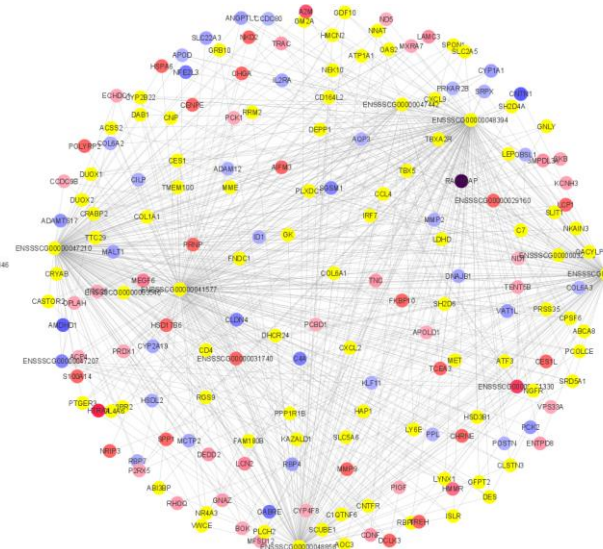

FoldChange

-5.10

5.10

Supplement: Supplementary file 1 [file supplementary]
